# Supplementary material for: Regulation of microglia polarization via mannose receptor-mediated delivery of siRNA by ligand-functionalized DoGo LNP
Source: Royal Society of Chemistry journal article supplement (doi:10.1039/d1ra04293a), 2021-01-01

**Supporting Information**

**Regulation of microglia polarization via mannose receptor-mediated  
delivery of siRNA by ligand-functionalized DoGo LNP**

Hai Xiao, Shuqin Han, Huricha Baigude\*

*Institute of Mongolian Medicinal Chemistry, School of Chemistry & Chemical Engineering, Inner Mongolia  
University, Hohhot, Inner Mongolia, 010020, P.R. China*

Correspondence to:

\*Correspondence to: Prof. Huricha Baigude (hbaigude@imu.edu.cn): Inner Mongolia Key Laboratory of Mongolian Medicinal  
Chemistry, School of Chemistry & Chemical Engineering, Inner Mongolia University, Hohhot, 010020 and P.R. China. Tel.: +86  
471 4992511; fax: +86 471 4992511

## Supporting Information

**Table S1.** Primer sequences

| Primer             | Sequences (5'-3')        |
|--------------------|--------------------------|
| m $\beta$ -actin-F | ctaaggccaaccgtgaactga    |
| m $\beta$ -actin-R | accagaggcatacagggaca     |
| mTLR4-F            | tcatcaaggatactctctgaagga |
| mTLR4-R            | gatgaaggaaaaggatgtagacc  |
| mCD206-F           | tcattggaagatccactctgg    |
| mCD206-R           | cagcgcttgatcttcattatag   |
| miNOS-F            | cttggccacggacgagac       |
| miNOS-R            | tcattgtactctgagggtgac    |

**Figure S1.** Analysis of DDv1Glu and DDv1Ma by Thin Layer Chromatography (TLC). Eluents: DCM/MeOH 5:1.

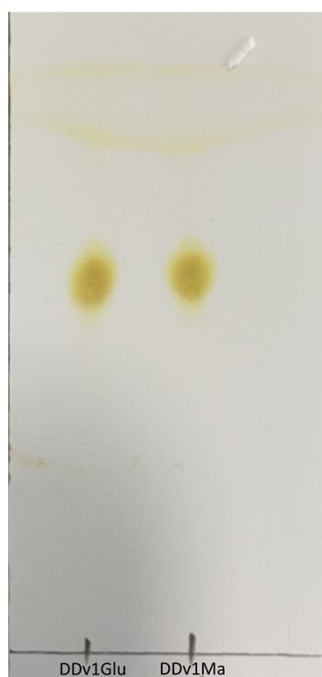

**Figure S2.** Particle size distribution of siRNA/G3 and siRNA/M3 complexes at different N/P ratios.

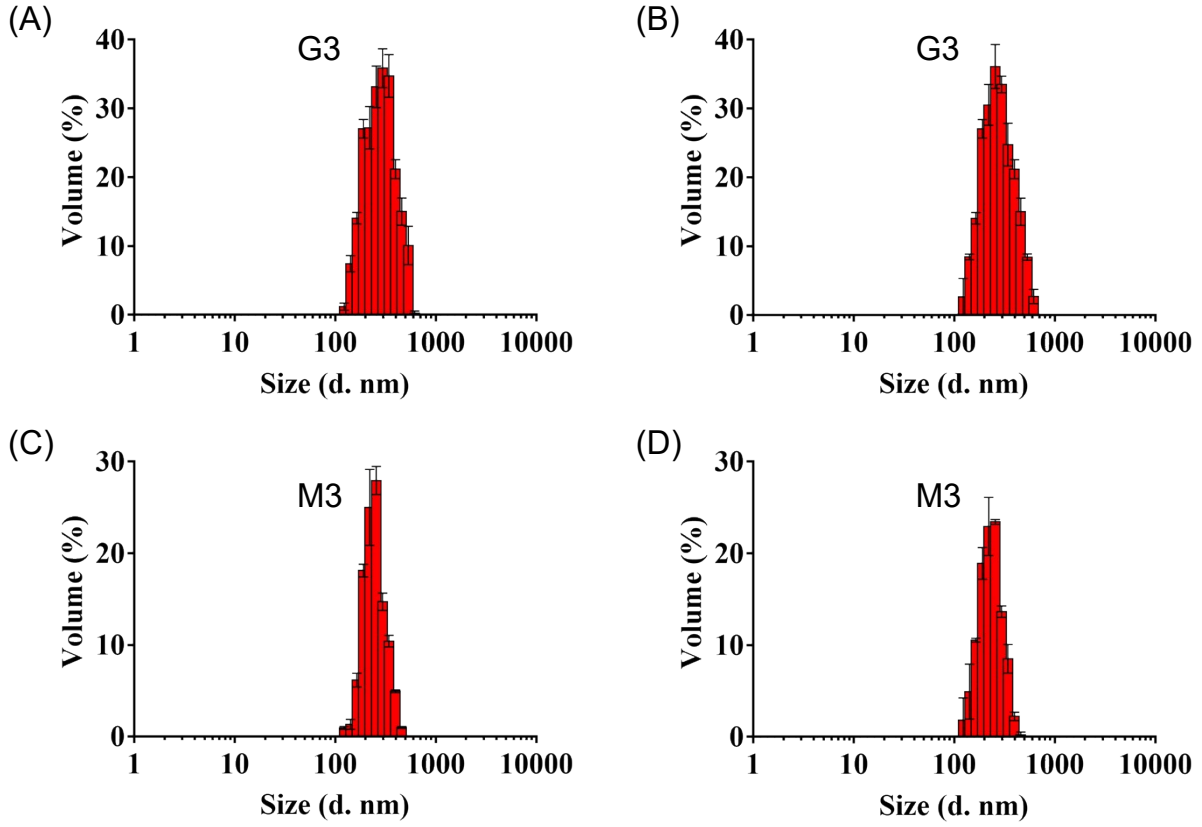

**Figure S3.** Electrostatic interaction assay of G and M formulations with siRNA at different amino/phosphate (N/P) ratio.

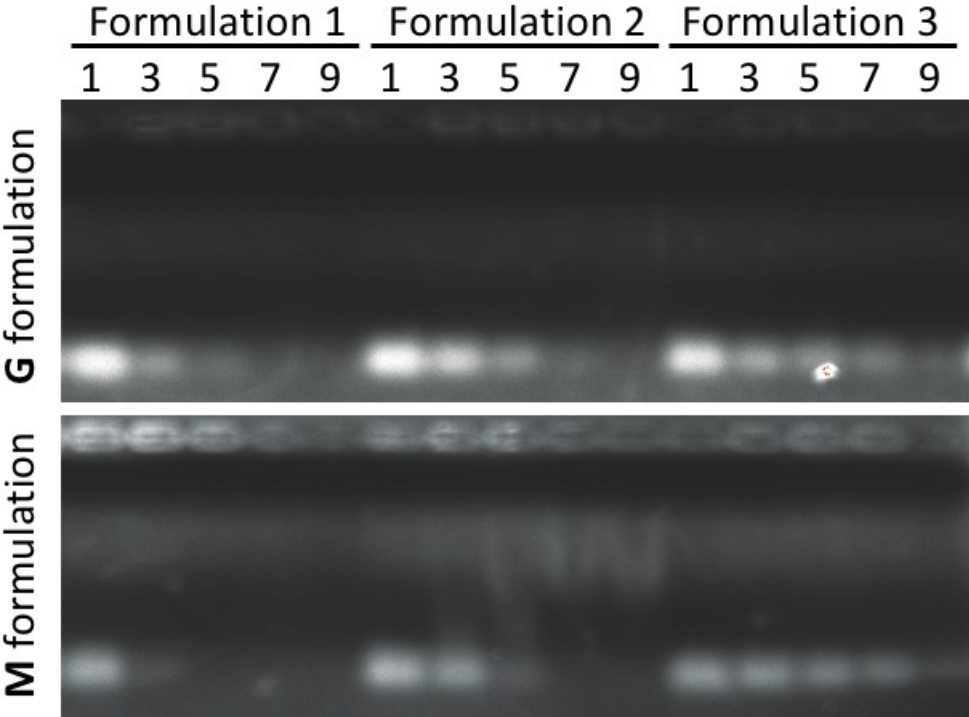

**Figure S4.** Confocal images of BV2 cells (A) and C8-D1A cells (B) treated with FITC-siRNA/G3, or siRNA/M3.

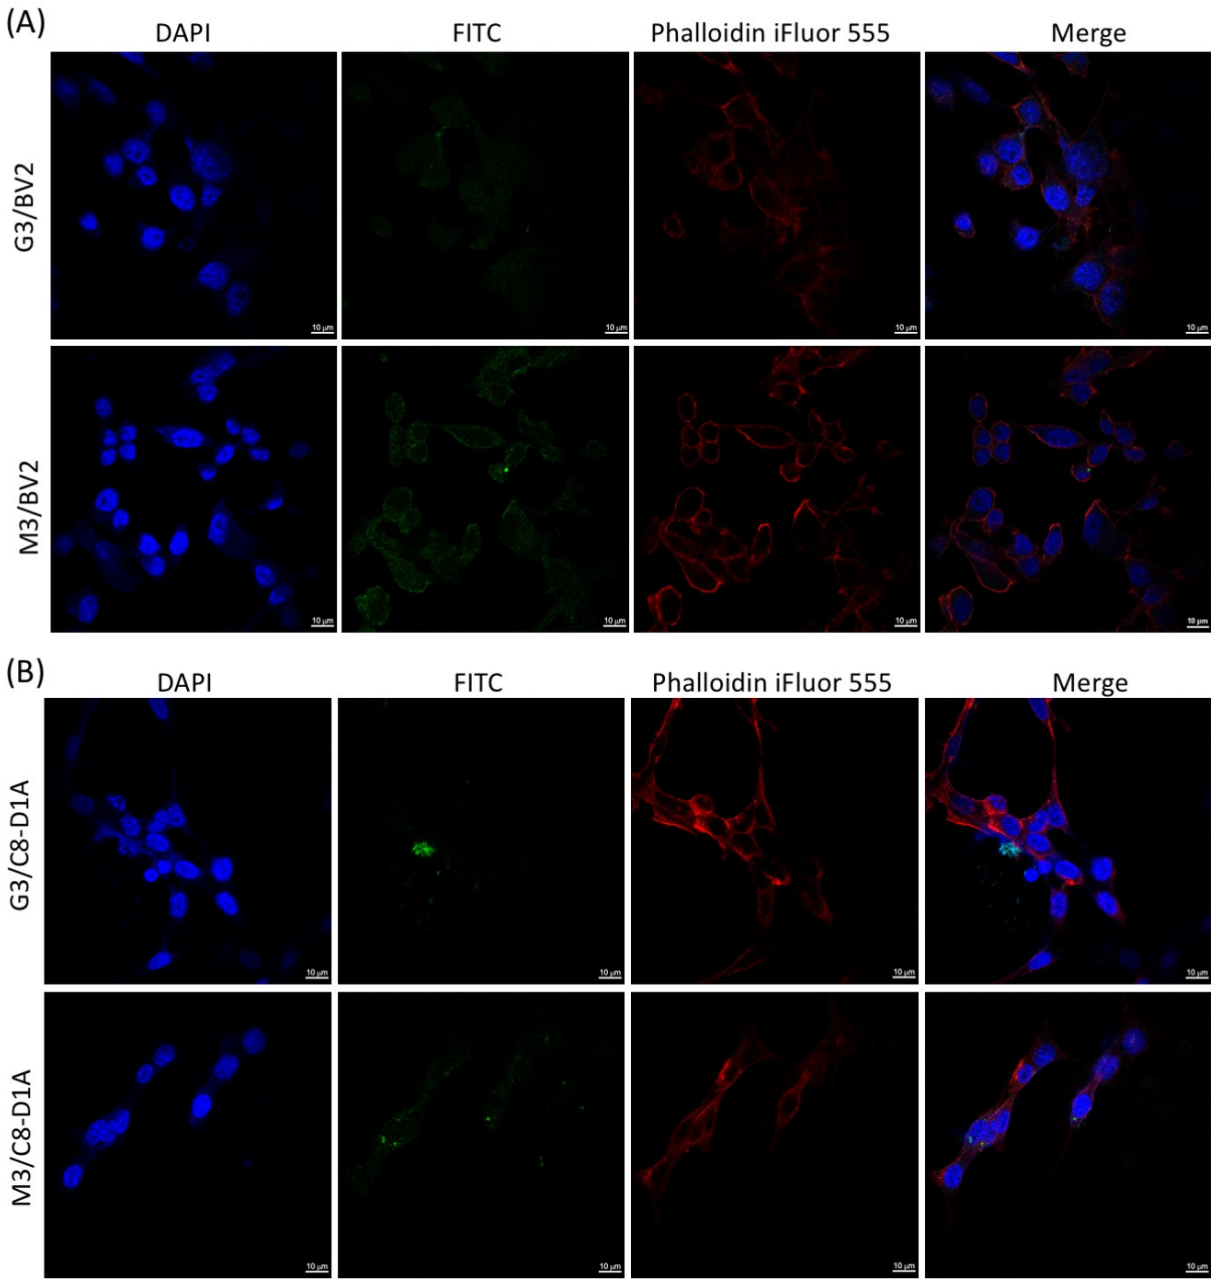

Supplement: d1ra04293a1.pdf [file d1ra04293a1.pdf]
